# Supplementary material for: Comparison of the effect of hyaluronic acid injection versus extracorporeal shockwave therapy on chronic plantar fasciitis: Protocol for a randomized controlled trial
Source: PubMed Central journal article supplement (PMC8224905; doi:10.1371/journal.pone.0250768), 2021-06-24
Supplement: pone.0250768.s003.pdf [file pone.0250768.s003.pdf]

**Projeto de Pesquisa:**

A comparação do efeito da injeção de ácido hialurônico versus terapia por ondas de choque extracorpórea na fascite plantar crônica: ensaio clínico randomizado

**Informações Preliminares****Responsável Principal**

|                               |                                       |
|-------------------------------|---------------------------------------|
| CPF/Documento: 354.474.218-70 | Nome: GABRIEL FERRAZ FERREIRA         |
| Telefone: 1135547084          | E-mail: gabriel.ferraz38@yahoo.com.br |

**Instituição Proponente**

|                          |                                                                     |
|--------------------------|---------------------------------------------------------------------|
| CNPJ: 00.461.479/0031-89 | Nome da Instituição: PREVENT SENIOR PRIVATE OPERADORA DE SAUDE LTDA |
|--------------------------|---------------------------------------------------------------------|

É um estudo internacional? Não

**Equipe de Pesquisa**

| CPF/Documento  | Nome                       |
|----------------|----------------------------|
| 268.802.128-16 | Miguel Viana Pereira Filho |

**Área de Estudo****Grandes Áreas do Conhecimento (CNPq)**

- Grande Área 4. Ciências da Saúde

**Propósito Principal do Estudo (OMS)**

- Clínico

**Título Público da Pesquisa:** A comparação do efeito da injeção de ácido hialurônico versus terapia por ondas de choque extracorpórea na fascite plantar crônica: ensaio clínico randomizado

**Contato Público**

| CPF/Documento  | Nome                    | Telefone   | E-mail                        |
|----------------|-------------------------|------------|-------------------------------|
| 354.474.218-70 | GABRIEL FERRAZ FERREIRA | 1135547084 | gabriel.ferraz38@yahoo.com.br |

**Contato Científico:** GABRIEL FERRAZ FERREIRA

## Desenho de Estudo / Apoio Financeiro

Desenho do Estudo: Intervenção/Experimental

### Condições de saúde ou problemas

#### Condição de saúde ou Problema

Fascite Plantar

Ácido Hialurônico

Ondas de Choque

### Descritores Gerais para as Condições de Saúde

CID1-10:Classificação Internacional de Doenças

| Código CID | Descrição CID |
|------------|---------------|
| M25.5      | Dor articular |

DeCS:Descritores em Ciência da Saúde

| Código DECS | Descrição DECS |
|-------------|----------------|
| 32350       | Artralgia      |

### Descritores Específicos para as Condições de Saúde

CID1-10:Classificação Internacional de Doenças

| Código CID | Descrição CID       |
|------------|---------------------|
| M77.3      | Esporao do calcaneo |

DeCS:Descritores em Ciência da Saúde

| Código DECS | Descrição DECS  |
|-------------|-----------------|
| 37270       | Fascite Plantar |

Tipo de Intervenção: Comparador

#### Natureza da Intervenção

- Fármaco/Medicamento/Vacina

### Descritores da Intervenção

Descritores da Intervenção

#### Intervenções

Ácido Hialurônico

Lista de CID

| Código CID | Descrição CID       |
|------------|---------------------|
| M77.3      | Esporao do calcaneo |

Lista de DECS

| Código DECS | Descrição DECS                                |
|-------------|-----------------------------------------------|
| 37270       | Fascite Plantar                               |
| 57173       | Tratamento por Ondas de Choque Extracorpóreas |

#### Fase

- Fase 1

#### Desenho:

O presente estudo será um ensaio clínico randomizado controlado, prospectivo, cuja eficácia do tratamento será avaliada por comparação entre dois grupos distintos: grupo de tratamento que receberá hialuronato de sódio e o grupo de tratamento por ondas de choque. Os pacientes incluídos no estudo serão provenientes do ambulatório da Unidade de ortopedia e traumatologia do Hospital Sancta Maggiore Mooca. O Objetivo do estudo é comparar os desfechos de dor: escala visual analógica (EVA)<sup>1</sup>, função mobilidade (AOFAS)<sup>2</sup>, e determinar a eficácia desses tratamentos (Apêndice 1, 2).

### Apoio Financeiro

| CNPJ | Nome | E-mail | Telefone | Tipo          |
|------|------|--------|----------|---------------|
|      |      |        |          | Financiamento |

**Palavra Chave**

## Palavra-chave

Fascite Plantar

Ácido Hialurônico

Tratamento por Ondas de Choque Extracorpóreas

**Detalhamento do Estudo****Resumo:**

A fascite plantar é uma afecção extremamente comum no dia a dia dos ortopedistas. Existem inúmeros tratamentos não invasivos descritos, porém em alguns casos não surgem efeito e podem evoluir para a cronicidade da lesão. Assim, alguns métodos mais invasivos como a infiltração da fáscia plantar com ácido hialurônico. O ácido hialurônico é muito utilizado nas artroses do joelho e outras articulações como opção para retardar o tratamento cirúrgico e como adjuvante no tratamento conservador. As propriedades bioquímicas dessa substância garantem uma diminuição do processo inflamatório bem como nutre a cartilagem articular. Desse modo, a infiltração do hialuronato de sódio pode atuar como mediador inflamatório e analgésico, evitando as complicações comuns causadas pela infiltração com corticosteroides. Outra opção para o tratamento da fascite plantar crônica é a terapia por ondas de choque, com diversos estudos demonstrando a sua eficácia. O objetivo desse estudo é comparar o efeito terapêutico da aplicação única de hialuronato de sódio para a fascite plantar crônica guiada por ultrassom com a terapia por ondas de choque.

**Introdução:**

O uso do hialuronato de sódio apresenta-se como importante tratamento não cirúrgico nas artroses do joelho, sendo uma opção no tratamento conservador. Essa substância possui características como mediadora da inflamação, reduzindo a passagem dessas células até o local aplicado.<sup>3-5</sup>

O uso do ácido hialurônico também foi descrito para o tratamento das patologias relacionados as inflamações extra-articulares, como tendões, ligamentos e fâscias. O estresse excessivo pode se concentrar na interface entre estruturas com propriedades mecânicas diferentes, causando uma variedade de condições patológicas.<sup>6</sup>

O tratamento mais utilizado para as entesopatias e especificamente a fascite plantar incluem alongamento de cadeia posterior, fisioterapia e uso drogas anti-inflamatórias não esteroidais.<sup>5-7</sup> Outra opção para o tratamento da fascite plantar crônica é a terapia por ondas de choque, com diversos estudos demonstrando a sua eficácia.<sup>8-11</sup>

O objetivo do estudo é comparar a eficácia terapêutica da aplicação de hialuronato de sódio para a fascite plantar crônica guiada por ultrassom com a terapia por ondas de choque.

**Hipótese:**

Acredita-se que o hialuronato de sódio possa permitir uma melhor reabilitação fisioterápica com menor quadro álgico e maior mobilidade, evitando procedimentos cirúrgicos custosos e possíveis riscos de complicações.

**Objetivo Primário:**

O objetivo primário do estudo é avaliar o efeito analgésico e anti-inflamatório da aplicação única de hialuronato de sódio para a fascite plantar crônica e comparar com a terapia por ondas de choque.

**Objetivo Secundário:**

O objetivo secundário do estudo é avaliar a função do pé e critérios de satisfação após a infiltração única de hialuronato de sódio para a fascite plantar crônica e comparar com a terapia por ondas de choque.

**Metodologia Proposta:**

Serão incluídos no estudo os pacientes com diagnóstico de fascite plantar nos ambulatórios da unidade de ortopedia e traumatologia do Hospital Sancta Maggiore Mooca que não apresentaram melhora dos sintomas com três meses no mínimo de tratamento conservador.

Os pacientes serão convidados a participar do estudo, e apresentados o termo de consentimento livre esclarecido (TCLE). Somente serão incluídos os indivíduos que assinarem o termo e concordar com os métodos de avaliação.

Após isso, tais pacientes serão randomizados para o grupo da infiltração com ácido hialurônico ou no grupo da terapia por ondas de choque. Os tratamentos serão realizados no ambulatório do próprio hospital. A aplicação do ácido hialurônico será realizada pelo mesmo profissional de saúde. Já o tratamento por ondas de choque, será realizada por outro profissional de saúde. A avaliação clínica com aplicação dos escores de dor, função e satisfação pessoal será realizado durante 24 meses nos seguintes intervalos de consultas: 1, 3, 6, 12 e 24.

O tamanho da amostra foi calculado através do pacote "pwr" do software R com previsão para o "teste T" segundo os parâmetros: teste do poder de 0,75, tamanho do efeito de 0,3 (proposto por Cohen) e nível de significância de 0,05, sendo o considerado necessário 100 participantes.

Desse modo, conseguiremos avaliar o resultado no curto, médio e longo prazo. Associado as terapias, os pacientes permanecerão em trabalho de reabilitação com fisioterapia. Os dados serão documentados no programa Excel, e, em seguida, realizada análise dos dados. O trabalho será submetido à Comissão de Ética local de acordo com a orientação da Plataforma Brasil.

Não haverá nenhum custo para a operadora de saúde ou para o próprio paciente nessa avaliação visto que ela será realizada em consultas de rotina previamente agendadas no ambulatório do autor e dos coautores.

A randomização será determinada usando uma tabela em bloco de randomização gerada por computador. A randomização em bloco (tamanhos aleatórios de 2, 4, 6 e 8) será usada para garantir que os grupos de tratamento sejam equilibrados ao longo do período do estudo. Essa estratégia garante que grupo intervenção e grupo controle sejam equilibrados quanto ao número de participantes. Para garantir o sigilo de alocação, deve-se utilizar variação aleatória dos tamanhos dos blocos (quatro a oito participantes por bloco). Utilizaremos o pacote blockrand para o software R para gerar a tabela de randomização.

**Riscos:**

A infiltração local do hialuronato de sódio pode ocorrer efeitos adversos como dor, sensação de calor, vermelhidão e edema, descritos na bula do medicamento. Não há riscos relacionados a drogas, exposição a agentes tóxicos, radioativos e medicamentos não autorizados pelas agências nacionais reguladoras. A terapia por ondas de choque poderá provocar um processo inflamatório e dor

local, mas em geral é rapidamente resolvida com analgésicos leves.

**Benefícios:**

A infiltração da fáscia plantar com o hialuronato de sódio apresenta vantagens descritas como no controle da dor, reposição do líquido peritendíneo, podendo proporcionar conforto prolongado e melhor reabilitação. A terapia por ondas de choque apresenta-se com excelente benefício para a fascite plantar como já descrito na literatura.

**Metodologia de Análise de Dados:**

As associações serão testadas pelo teste comparativo de médias de Mann-Whitney com nível de significância de 5%, após avaliar a distribuição das amostras pelo teste de Kolmogorov-Smirnov, e, portanto, consideradas associações estatisticamente significativas aquelas cujo valor de p foi inferior a 0,05. Utilizaremos o teste de chi-quadrado ou exato de Fischer para avaliar as variáveis categóricas. A análise estatística será realizada através do pacote stats para o software R.

**Desfecho Primário:**

Essa técnica poderá ser usada nas fascites plantares crônicas como coadjuvante para analgesia e melhor reabilitação, evitando procedimento cirúrgicos invasivos e custosos.

**Tamanho da Amostra no Brasil:** 100

**Data do Primeiro Recrutamento:** 02/03/2020

**Países de Recrutamento**

| País de Origem do Estudo | País   | Nº de participantes da pesquisa |
|--------------------------|--------|---------------------------------|
| Sim                      | BRASIL | 100                             |

**Outras Informações**

**Haverá uso de fontes secundárias de dados (prontuários, dados demográficos, etc)?**

Não

**Informe o número de indivíduos abordados pessoalmente, recrutados, ou que sofrerão algum tipo de intervenção neste centro de pesquisa:**

100

**Grupos em que serão divididos os participantes da pesquisa neste centro**

| ID Grupo                                      | Nº de Indivíduos | Intervenções a serem realizadas                                          |
|-----------------------------------------------|------------------|--------------------------------------------------------------------------|
| Ácido Hialurônico                             | 50               | Infiltração da fáscia plantar guiada por ultrassom com ácido hialurônico |
| Tratamento por Ondas de Choque Extracorpóreas | 50               | Três sessões de terapia por ondas de choque extracorpórea                |

**O Estudo é Multicêntrico no Brasil?**

Não

**Propõe dispensa do TCLE?**

Não

**Haverá retenção de amostras para armazenamento em banco?**

Não

**Cronograma de Execução**

| Identificação da Etapa                        | Início (DD/MM/AAAA) | Término (DD/MM/AAAA) |
|-----------------------------------------------|---------------------|----------------------|
| Envio do Projeto a Comissão de ética          | 01/11/2019          | 01/12/2019           |
| Elaboração do projeto                         | 23/10/2019          | 30/10/2019           |
| Análise dos resultados e correção estatística | 01/02/2021          | 28/02/2021           |
| Idealização do tema                           | 23/10/2019          | 30/10/2019           |
| Elaboração do artigo para publicação          | 01/03/2021          | 01/05/2021           |
| Envio do artigo para publicação               | 01/06/2021          | 01/07/2021           |
| Coleta de dados                               | 01/03/2020          | 01/01/2021           |

**Orçamento Financeiro**

| Identificação de Orçamento | Tipo    | Valor em Reais (R\$) |
|----------------------------|---------|----------------------|
| Papelaria                  | Custeio | R\$ 200,00           |
| Total em R\$               |         | R\$ 200,00           |

Data de Submissão do Projeto: 01/11/2019

Nome do Arquivo: PB\_INFORMAÇÕES\_BÁSICAS\_DO\_PROJETO\_1458201.pdf

Versão do Projeto: 1

**Bibliografia:**

A pesquisa bibliográfica foi realizada através dos bancos de dados PubMed, Bireme e livros- texto referentes ao tema estudado. 1. Downie W, Leatham P, Rhind V, Wright V, Branco J, Anderson J. Studies with pain rating scales. Ann Rheum Dis 1978;37(4):378-81. 2. Coughlin MJ. Treatment of bunionette deformity with longitudinal diaphyseal osteotomy with distal soft tissue repair. Foot Ankle 1991;11(4):195-203. 3. Kitaoka HB, Alexander IJ, Adelaar RS, Nunley JA, Myerson MS, Sanders M. Clinical rating systems for the ankle-hindfoot, midfoot, hallux, and lesser toes. Foot Ankle Int 1994;15(7):349-53. doi: 10.1177/107110079401500701. 4. Altman R, Lim S, Steen RG, Dasa V. Hyaluronic acid injections are associated with delay of total knee replacement surgery in patients with knee osteoarthritis: evidence from a large U.S. health claims database. PLoS One 10:e0145776, 2015. 5. Saw KY, Hussin P, Loke SC, Azam M, Chen HC, Tay YG, Low S, Wallin KL, Ragavanaidu K. Articular cartilage regeneration with autologous marrow aspirate and hyaluronic acid: an experimental study in a goat model. Arthroscopy 25:1391–1400, 2009. 6. Petrella RJ, Petrella MJ, Cogliano A. Periarticular hyaluronic acid in acute ankle sprain. Clin J Sport Med 17:251–257, 2007. 7. Petrella MJ, Cogliano A, Petrella RJ. Original research: long-term efficacy and safety of periarticular hyaluronic acid in acute ankle sprain. Phys Sportsmed 37:64–70,2009. 8. Bøddeker R, Schäfer H, Haake M (2001) Extracorporeal shockwave therapy (ESWT) in the treatment of plantar fasciitis—a biometrical review. Clin Rheumatol 20(5):324–330 9. Buchbinder R, Ptasznik R, Gordon J et al (2002) Ultrasoundguided extracorporeal shock wave therapy for plantar fasciitis: a randomized controlled trial. JAMA 288(11):1364–1372 10. Basford JR, Malanga GA, Krause DA et al (1998) A randomized controlled evaluation of low-intensity laser therapy: plantar fasciitis. Arch Phys Med Rehabil 79(3):249–254 11. Kamel M, Kotob H (2000) High frequency ultrasonographic findings in plantar fasciitis and assessment of local steroid injection. J Rheumatol 27(9):2139–2141

**Upload de Documentos****Arquivo Anexos:**

| Tipo                                                      | Arquivo                       |
|-----------------------------------------------------------|-------------------------------|
| Projeto Detalhado / Brochura Investigador                 | PROJETO_PESQUISA.pdf          |
| Declaração de Pesquisadores                               | Declaracao_do_Pesquisador.pdf |
| Cronograma                                                | CRONOGRAMA.pdf                |
| Outros                                                    | Parecer.pdf                   |
| Folha de Rosto                                            | FolhaDeRosto.pdf              |
| TCLE / Termos de Assentimento / Justificativa de Ausência | TCLE.pdf                      |
| Outros                                                    | APRESENTACAO.pdf              |
| Declaração de Instituição e Infraestrutura                | infraestrutura.pdf            |
| Orçamento                                                 | ORCAMENTO.pdf                 |

**Finalizar**

Manter sigilo da integra do projeto de pesquisa: Não
