# Supplementary material for: Comparison of the effect of hyaluronic acid injection versus extracorporeal shockwave therapy on chronic plantar fasciitis: Protocol for a randomized controlled trial
Source: PubMed Central journal article supplement (PMC8224905; doi:10.1371/journal.pone.0250768), 2021-06-24
Supplement: pone.0250768.s005.pdf [file pone.0250768.s005.pdf]

# PREVENT SENIOR

## PARECER CONSUBSTANCIADO DO CEP

### DADOS DA EMENDA

**Título da Pesquisa:** A comparação do efeito da injeção de ácido hialurônico versus terapia por ondas de choque extracorpórea na fascite plantar crônica: ensaio clínico randomizado

**Pesquisador:** GABRIEL FERRAZ FERREIRA

**Área Temática:**

**Versão:** 4

**CAAE:** 25585319.5.0000.8114

**Instituição Proponente:** PREVENT SENIOR PRIVATE OPERADORA DE SAUDE LTDA

**Patrocinador Principal:** Financiamento Próprio

### DADOS DO PARECER

**Número do Parecer:** 4.227.201

#### **Apresentação do Projeto:**

O presente estudo será um ensaio clínico randomizado controlado, prospectivo, cuja eficácia do tratamento será avaliada por comparação entre dois

grupos distintos: grupo de tratamento que receberá hialuronato de sódio e o grupo de tratamento por ondas de choque. Os pacientes incluídos no

estudo serão provenientes do ambulatório da Unidade de ortopedia e traumatologia do Hospital Sancta Maggiore Mooca. O Objetivo do estudo é

comparar os desfechos de dor: escala visual analógica (EVA)<sup>1</sup>, função mobilidade (AOFAS)<sup>2</sup>, e determinar a eficácia desses tratamentos. A fascite plantar é uma afecção extremamente comum no dia a dia dos ortopedistas. Existem inúmeros tratamentos não invasivos descritos, porém

em alguns casos não surgem efeito e podem evoluir para a cronicidade da lesão. Assim, alguns métodos mais invasivos como a infiltração da fásia

plantar com ácido hialurônico. O ácido hialurônico é muito utilizado nas artroses do joelho e outras articulações como opção para retardar o

tratamento cirúrgico e como adjuvante no tratamento conservador. As propriedades bioquímicas dessa substância garantem uma diminuição do

processo inflamatório bem como nutre a cartilagem articular. Desse modo, a infiltração do hialuronato de sódio pode atuar como mediador

**Endereço:** Rua Lourenço Marques, 158, 9º andar, sala CEP

**Bairro:** Vila Olímpia

**CEP:** 04.547-100

**UF:** SP

**Município:** SAO PAULO

**Telefone:** (11)4085-9070

**E-mail:** cepps@preventsenior.com.br

# PREVENT SENIOR

Continuação do Parecer: 4.227.201

inflamatório e analgésico, evitando as complicações comuns causadas pela infiltração com corticosteroides. Outra opção para o tratamento da fascite plantar crônica é a terapia por ondas de choque, com diversos estudos demonstrando a sua eficácia. O objetivo desse estudo é comparar o efeito terapêutico da aplicação única de hialuronato de sódio para a fascite plantar crônica guiada por ultrassom com a terapia por ondas de choque.

## **Objetivo da Pesquisa:**

Objetivo Primário:

O objetivo primário do estudo é avaliar o efeito analgésico e anti-inflamatório da aplicação única de hialuronato de sódio para a fascite plantar crônica e comparar com a terapia por ondas de choque.

Objetivo Secundário:

O objetivo secundário do estudo é avaliar a função do pé e critérios de satisfação após a infiltração única de hialuronato de sódio para a fascite plantar crônica e comparar com a terapia por ondas de choque.

## **Avaliação dos Riscos e Benefícios:**

A infiltração local do hialuronato de sódio pode ocorrer efeitos adversos como dor, sensação de calor, vermelhidão e edema, descritos na bula do medicamento. Não há riscos relacionados a drogas, exposição a agentes tóxicos, radioativos e medicamentos não autorizados pelas agências nacionais reguladoras. A terapia por ondas de choque poderá provocar um processo inflamatório e dor local, mas em geral é rapidamente resolvida com analgésicos leves.

Benefícios:

A infiltração da fáscia plantar com o hialuronato de sódio apresenta vantagens descritas como no controle da dor, reposição do líquido peritendíneo, podendo proporcionar conforto prolongado e melhor reabilitação. A terapia por ondas de choque apresenta-se com excelente benefício para a fascite plantar como já descrito na literatura.

## **Comentários e Considerações sobre a Pesquisa:**

Emenda apresentada para alteração do número de participantes com redução de 100 para 80,

**Endereço:** Rua Lourenço Marques, 158, 9º andar, sala CEP

**Bairro:** Vila Olímpia

**CEP:** 04.547-100

**UF:** SP

**Município:** SAO PAULO

**Telefone:** (11)4085-9070

**E-mail:** cepps@preventsenior.com.br

# PREVENT SENIOR

Continuação do Parecer: 4.227.201

mantendo a qualidade dos dados que serão obtidos.

O tamanho da amostra foi calculado através do pacote "pwr" do software R com previsão para o "teste T" segundo os

parâmetros: teste do poder de 0,80, tamanho do efeito de 0,3 (proposto por Cohen) e nível de significância de 0,001, sendo o considerado

necessário 80 participantes.

## Considerações sobre os Termos de apresentação obrigatória:

não se aplica

## Recomendações:

não se aplica

## Conclusões ou Pendências e Lista de Inadequações:

O projeto intitulado "A comparação do efeito da injeção de ácido hialurônico versus terapia por ondas de choque extracorpórea na fascite plantar crônica: ensaio clínico randomizado" teve sua emenda aprovada.

## Considerações Finais a critério do CEP:

### Este parecer foi elaborado baseado nos documentos abaixo relacionados:

| Tipo Documento                                            | Arquivo                               | Postagem               | Autor                   | Situação |
|-----------------------------------------------------------|---------------------------------------|------------------------|-------------------------|----------|
| Informações Básicas do Projeto                            | PB_INFORMAÇÕES_BÁSICAS_1613401_E1.pdf | 20/08/2020<br>15:11:31 |                         | Aceito   |
| Orçamento                                                 | ORCAMENTO_TERCEIRA_REVISAO.pdf        | 20/08/2020<br>15:06:54 | GABRIEL FERRAZ FERREIRA | Aceito   |
| Projeto Detalhado / Brochura Investigador                 | PROJETO_PESQUISA_SEXTA_REVISAO.pdf    | 20/08/2020<br>15:05:36 | GABRIEL FERRAZ FERREIRA | Aceito   |
| Outros                                                    | CARTA_RESPOSTA_SEXTA_REVISAO.pdf      | 20/02/2020<br>15:00:52 | GABRIEL FERRAZ FERREIRA | Aceito   |
| Outros                                                    | Termo_Confidencialidade.pdf           | 20/02/2020<br>14:59:57 | GABRIEL FERRAZ FERREIRA | Aceito   |
| TCLE / Termos de Assentimento / Justificativa de Ausência | TCLE_QUINTA_REVISAO.pdf               | 20/02/2020<br>14:59:08 | GABRIEL FERRAZ FERREIRA | Aceito   |
| Outros                                                    | Validacao_Gabriel07.pdf               | 31/01/2020<br>14:45:09 | DANIELA RIMOLDI CUNHA   | Aceito   |
| Outros                                                    | Validacao_Gabriel06.pdf               | 24/01/2020<br>16:40:15 | DANIELA RIMOLDI CUNHA   | Aceito   |

**Endereço:** Rua Lourenço Marques, 158, 9º andar, sala CEP

**Bairro:** Vila Olímpia

**CEP:** 04.547-100

**UF:** SP

**Município:** SAO PAULO

**Telefone:** (11)4085-9070

**E-mail:** cepps@preventsenior.com.br

# PREVENT SENIOR

Continuação do Parecer: 4.227.201

|                                                  |                               |                        |                                   |        |
|--------------------------------------------------|-------------------------------|------------------------|-----------------------------------|--------|
| Outros                                           | Validacao_Gabriel_05.docx     | 13/01/2020<br>15:34:52 | DANIELA RIMOLDI<br>CUNHA          | Aceito |
| Outros                                           | CARTA_CEP_29_12_19.pdf        | 29/12/2019<br>21:40:11 | GABRIEL FERRAZ<br>FERREIRA        | Aceito |
| Outros                                           | Validacao_gabriel04.pdf       | 20/12/2019<br>11:09:04 | Henrique Guindalini<br>Deliberato | Aceito |
| Outros                                           | Parecer_IPS.pdf               | 18/12/2019<br>17:46:42 | GABRIEL FERRAZ<br>FERREIRA        | Aceito |
| Folha de Rosto                                   | FOLHA_DE_ROSTO.pdf            | 18/12/2019<br>17:45:02 | GABRIEL FERRAZ<br>FERREIRA        | Aceito |
| Outros                                           | Validacao_Gabriel03.pdf       | 02/12/2019<br>15:04:56 | Henrique Guindalini<br>Deliberato | Aceito |
| Outros                                           | Validacao_Gabriel02.pdf       | 11/11/2019<br>13:58:23 | Henrique Guindalini<br>Deliberato | Aceito |
| Outros                                           | Validacao_Gabriel01.pdf       | 04/11/2019<br>16:21:02 | Henrique Guindalini<br>Deliberato | Aceito |
| Declaração de<br>Instituição e<br>Infraestrutura | infraestrutura.pdf            | 01/11/2019<br>11:54:02 | GABRIEL FERRAZ<br>FERREIRA        | Aceito |
| Outros                                           | APRESENTACAO.pdf              | 23/10/2019<br>11:32:00 | GABRIEL FERRAZ<br>FERREIRA        | Aceito |
| Declaração de<br>Pesquisadores                   | Declaracao_do_Pesquisador.pdf | 23/10/2019<br>11:31:31 | GABRIEL FERRAZ<br>FERREIRA        | Aceito |

**Situação do Parecer:**

Aprovado

**Necessita Apreciação da CONEP:**

Não

SAO PAULO, 20 de Agosto de 2020

---

**Assinado por:**  
**PATRICIA ESPINDOLA BRETAS BERBARE**  
**(Coordenador(a))**

**Endereço:** Rua Lourenço Marques, 158, 9º andar, sala CEP

**Bairro:** Vila Olímpia

**CEP:** 04.547-100

**UF:** SP

**Município:** SAO PAULO

**Telefone:** (11)4085-9070

**E-mail:** cepps@preventsenior.com.br
