# Supplementary material for: Comparison of the effect of hyaluronic acid injection versus extracorporeal shockwave therapy on chronic plantar fasciitis: Protocol for a randomized controlled trial
Source: PubMed Central journal article supplement (PMC8224905; doi:10.1371/journal.pone.0250768), 2021-06-24
Supplement: pone.0250768.s006.pdf [file pone.0250768.s006.pdf]

# PREVENT SENIOR

## CONSUBSTANCED OPINION OF THE CEP

### RESEARCH PROJECT DATA

**Search Title:** Comparison of the effect of hyaluronic acid injection versus extracorporeal shockwave therapy on chronic plantar fasciitis: Protocol for a randomized controlled trial

**Researcher:** GABRIEL FERRAZ FERREIRA

**Thematic Area:**

**Version:** 2

**CAAE:** 25585319.5.0000.8114

**Proponent Institution:** PREVENT SENIOR PRIVATE OPERADORA DE SAUDE LTDA

Main Sponsor: Own Financing

### OPINION DATA

Opinion Number: 3,912,441

Project presentation:

Plantar fasciitis is an extremely common condition in orthopedists' daily lives.

There are countless non-invasive treatments described, but in some cases they do not show any effect and can evolve to the chronicity of the lesion. Thus, some more invasive methods such as infiltration of the plantar fascia with hyaluronic acid. Hyaluronic acid is widely used in arthrosis of the knee and other joints as an option to delay surgical treatment and as an adjunct to conservative treatment.

The biochemical properties of this substance guarantee a decrease in the inflammatory process as well as nourishing the articular cartilage. Thus, sodium hyaluronate infiltration can act as an inflammatory and analgesic mediator, avoiding the common complications caused by infiltration with corticosteroids. Another option for the treatment of chronic plantar fasciitis is shockwave therapy, with several studies demonstrating its effectiveness.

The present study will be a prospective randomized controlled clinical trial, whose treatment effectiveness will be evaluated by comparing two different groups: treatment group that will receive sodium hyaluronate and the shock wave treatment group. The patients included in the study will come from the outpatient clinic of the Orthopedics and

**Endereço:** Rua Lourenço Marques 158, 6º andar

**Bairro:** VILA OLIMPIA

**CEP:** 04.550-004

**UF:** SP

**Município:** SAO PAULO

**Telefone:** (11)4085-9070

**E-mail:** cepps@preventsenior.com.br

## PREVENT SENIOR

Continuation of Opinion: 3,912,441

traumatologist Hospital Sancta Maggiore Mooca. The objective of the study is to compare pain outcomes: visual analog scale (VAS), mobility function (AOFAS), and determine the effectiveness of these treatments.

Research Objective:

PRIMARY OBJECTIVE:

The primary objective of the study is to evaluate the analgesic and anti-inflammatory effect of the single application of sodium hyaluronate for chronic plantar fasciitis and to compare it with shock wave therapy.

SECONDARY OBJECTIVE:

The secondary objective of the study is to assess foot function and satisfaction criteria after a single infiltration of sodium hyaluronate for chronic plantar fasciitis and to compare it with shock wave therapy.

Assessment of Risks and Benefits:

RISKS:

The local infiltration of sodium hyaluronate can cause adverse effects such as pain, feeling of heat, redness and edema, described in the package insert. There are no risks related to drugs, exposure to toxic, radioactive agents and drugs not authorized by national regulatory agencies. Shockwave therapy may cause an inflammatory process and local pain, but it is usually quickly resolved with mild pain relievers.

BENEFITS:

The infiltration of the plantar fascia with sodium hyaluronate has advantages described as in pain control, replacement of peritendinous fluid, which can provide prolonged comfort and better rehabilitation. Shock wave therapy has an excellent benefit for plantar fasciitis as described in the literature.

**Endereço:** Rua Lourenço Marques 158, 6º andar

**Bairro:** VILA OLIMPIA

**CEP:** 04.550-004

**UF:** SP

**Município:** SAO PAULO

**Telefone:** (11)4085-9070

**E-mail:** cepps@preventsenior.com.br

# PREVENT SENIOR

Continuação do Parecer: 3.912.441

## Research Comments and Considerations:

The study is relevant to scientific medical development in general, as it aims to analyze the use of less invasive products and procedures to the detriment of more costly procedures and high rehabilitation of the patient.

Thus, such a study can be a clinical reference for future interventions in the field of orthopedics

## Mandatory submission terms considerations:

All terms were changed as requested in a previous opinion and are in accordance with CEP requirements and guidelines.

## Recommendations:

Attention is recommended in compliance with the requirements of Res. 466/12 and complementary and Guide to Good Practices.

Pay attention to the period and send partial reports (half-yearly) and final study report to the CEP-CONEP system, via the Brazil platform, to monitor the development of the work.

## Conclusions or Pending and List of Inadequacies:

The pending issues were met and / or justified.

## Final Considerations at the discretion of the CEP:

This opinion was prepared based on the documents listed below:

| Document Type                          | File                                          | Post                   | Author                  | Situation |
|----------------------------------------|-----------------------------------------------|------------------------|-------------------------|-----------|
| Basic Project Information              | PB_INFORMAÇÕES_BÁSICAS_DO_PROJETO_1458201.pdf | 20/02/2020<br>15:01:35 |                         | OK        |
| Budget                                 | ORCAMENTO_SEGUNDA_REVISAO.pdf                 | 20/02/2020<br>15:01:22 | GABRIEL FERRAZ FERREIRA | OK        |
| Detailed Project / Researcher Brochure | PROJETO_PESQUISA_QUINTA_REVISAO.pdf           | 20/02/2020<br>15:01:12 | GABRIEL FERRAZ FERREIRA | OK        |
| Others                                 | CARTA_RESPOSTA_SEXTA_REVISAO.pdf              | 20/02/2020<br>15:00:52 | GABRIEL FERRAZ FERREIRA | OK        |
| Schedule                               | CRONOGRAMA_PRIMEIRA_REVISAO.pdf               | 20/02/2020<br>15:00:11 | GABRIEL FERRAZ FERREIRA | OK        |
| Others                                 | Termo_Confidencialidade.pdf                   | 20/02/2020<br>14:59:57 | GABRIEL FERRAZ FERREIRA | OK        |
| IC / Terms of                          | TCLE_QUINTA_REVISAO.pdf                       | 20/02/2020             | GABRIEL FERRAZ          | OK        |

**Endereço:** Rua Lourenço Marques 158, 6º andar

**Bairro:** VILA OLIMPIA

**CEP:** 04.550-004

**UF:** SP

**Município:** SAO PAULO

**Telefone:** (11)4085-9070

**E-mail:** cepps@preventsenior.com.br

# PREVENT SENIOR

Continuação do Parecer: 3.912.441

|                                            |                               |                        |                                   |        |
|--------------------------------------------|-------------------------------|------------------------|-----------------------------------|--------|
| Assentimento / Justificativa de Ausência   | TCLE_QUINTA_REVISAO.pdf       | 14:59:08               | FERREIRA                          | Aceito |
| Outros                                     | Validacao_Gabriel07.pdf       | 31/01/2020<br>14:45:09 | DANIELA RIMOLDI<br>CUNHA          | Aceito |
| Outros                                     | Validacao_Gabriel06.pdf       | 24/01/2020<br>16:40:15 | DANIELA RIMOLDI<br>CUNHA          | Aceito |
| Outros                                     | Validacao_Gabriel_05.docx     | 13/01/2020<br>15:34:52 | DANIELA RIMOLDI<br>CUNHA          | Aceito |
| Outros                                     | CARTA_CEP_29_12_19.pdf        | 29/12/2019<br>21:40:11 | GABRIEL FERRAZ<br>FERREIRA        | Aceito |
| Outros                                     | Validacao_gabriel04.pdf       | 20/12/2019<br>11:09:04 | Henrique Guindalini<br>Deliberato | Aceito |
| Outros                                     | Parecer_IPS.pdf               | 18/12/2019<br>17:46:42 | GABRIEL FERRAZ<br>FERREIRA        | Aceito |
| Folha de Rosto                             | FOLHA_DE_ROSTO.pdf            | 18/12/2019<br>17:45:02 | GABRIEL FERRAZ<br>FERREIRA        | Aceito |
| Outros                                     | Validacao_Gabriel03.pdf       | 02/12/2019<br>15:04:56 | Henrique Guindalini<br>Deliberato | Aceito |
| Outros                                     | Validacao_Gabriel02.pdf       | 11/11/2019<br>13:58:23 | Henrique Guindalini<br>Deliberato | Aceito |
| Outros                                     | Validacao_Gabriel01.pdf       | 04/11/2019<br>16:21:02 | Henrique Guindalini<br>Deliberato | Aceito |
| Declaração de Instituição e Infraestrutura | infraestrutura.pdf            | 01/11/2019<br>11:54:02 | GABRIEL FERRAZ<br>FERREIRA        | Aceito |
| Outros                                     | APRESENTACAO.pdf              | 23/10/2019<br>11:32:00 | GABRIEL FERRAZ<br>FERREIRA        | Aceito |
| Declaração de Pesquisadores                | Declaracao_do_Pesquisador.pdf | 23/10/2019<br>11:31:31 | GABRIEL FERRAZ<br>FERREIRA        | Aceito |

## Opinion Status:

Approved

## Needs CONEP Appreciation:

No

SAO PAULO, 12 de Março de 2020

---

**Assinado por:**  
**PATRICIA ESPINDOLA BRETAS BERBARE**  
**(Coordenador(a))**

**Endereço:** Rua Lourenço Marques 158, 6º andar

**Bairro:** VILA OLIMPIA

**CEP:** 04.550-004

**UF:** SP

**Município:** SAO PAULO

**Telefone:** (11)4085-9070

**E-mail:** cepps@preventsenior.com.br
