# Supplementary material for: Comparison of the effect of hyaluronic acid injection versus extracorporeal shockwave therapy on chronic plantar fasciitis: Protocol for a randomized controlled trial
Source: PubMed Central journal article supplement (PMC8224905; doi:10.1371/journal.pone.0250768), 2021-06-24
Supplement: pone.0250768.s007.pdf [file pone.0250768.s007.pdf]

# PREVENT SENIOR

## PARECER CONSUBSTANCIADO DO CEP

### DADOS DO PROJETO DE PESQUISA

**Título da Pesquisa:** A comparação do efeito da injeção de ácido hialurônico versus terapia por ondas de choque extracorpórea na fascite plantar crônica: ensaio clínico randomizado

**Pesquisador:** GABRIEL FERRAZ FERREIRA

**Área Temática:**

**Versão:** 2

**CAAE:** 25585319.5.0000.8114

**Instituição Proponente:** PREVENT SENIOR PRIVATE OPERADORA DE SAUDE LTDA

**Patrocinador Principal:** Financiamento Próprio

### DADOS DO PARECER

**Número do Parecer:** 3.912.441

#### **Apresentação do Projeto:**

A fascite plantar é uma afecção extremamente comum no dia a dia dos ortopedistas.

Existem inúmeros tratamentos não invasivos descritos, porém em alguns casos não surgem efeito e podem evoluir para a cronicidade da lesão. Assim, alguns métodos mais invasivos como a infiltração da fáscia plantar com ácido hialurônico. O ácido hialurônico é muito utilizado nas artroses do joelho e outras articulações como opção para retardar o tratamento cirúrgico e como adjuvante no tratamento conservador.

As propriedades bioquímicas dessa substância garantem uma diminuição do processo inflamatório bem como nutre a cartilagem articular. Desse modo, a infiltração do hialuronato de sódio pode atuar como mediador inflamatório e analgésico, evitando as complicações comuns causadas pela infiltração com corticosteroides. Outra opção para o tratamento da fascite plantar crônica é a terapia por ondas de choque, com diversos estudos demonstrando a sua eficácia.

O presente estudo será um ensaio clínico randomizado controlado, prospectivo, cuja eficácia do tratamento será avaliada por comparação entre dois grupos distintos: grupo de tratamento que receberá hialuronato de sódio e o grupo de tratamento por ondas de choque. Os pacientes incluídos no estudo serão provenientes do ambulatório da Unidade de ortopedia e

**Endereço:** Rua Lourenço Marques 158, 6º andar

**Bairro:** VILA OLIMPIA

**CEP:** 04.550-004

**UF:** SP

**Município:** SAO PAULO

**Telefone:** (11)4085-9070

**E-mail:** cepps@preventsenior.com.br

# PREVENT SENIOR

Continuação do Parecer: 3.912.441

traumatologiado Hospital Sancta Maggiore Mooca. O Objetivo do estudo é comparar os desfechos de dor: escala visual analógica (EVA), função mobilidade (AOFAS), e determinar a eficácia desses tratamentos.

## **Objetivo da Pesquisa:**

### **OBJETIVO PRIMÁRIO:**

O objetivo primário do estudo é avaliar o efeito analgésico e anti-inflamatório da aplicação única de hialuronato de sódio para a fascite plantar crônica e comparar com a terapia por ondas de choque.

### **OBJETIVO SECUNDÁRIO:**

O objetivo secundário do estudo é avaliar a função do pé e critérios de satisfação após a infiltração única de hialuronato de sódio para a fascite plantar crônica e comparar com a terapia por ondas de choque.

## **Avaliação dos Riscos e Benefícios:**

### **RISCOS:**

A infiltração local do hialuronato de sódio pode ocorrer efeitos adversos como dor, sensação de calor, vermelhidão e edema, descritos na bula do medicamento. Não há riscos relacionados a drogas, exposição a agentes tóxicos, radioativos e medicamentos não autorizados pelas agências nacionais reguladoras. A terapia por ondas de choque poderá provocar um processo inflamatório e dor local, mas em geral é rapidamente resolvida com analgésicos leves.

### **BENEFÍCIOS:**

A infiltração da fáscia plantar com o hialuronato de sódio apresenta vantagens descritas como no controle da dor, reposição do líquido peritendíneo, podendo proporcionar conforto prolongado e melhor reabilitação. A terapia por ondas de choque apresenta-se com excelente benefício para a fascite plantar como já descrito na literatura.

**Endereço:** Rua Lourenço Marques 158, 6º andar

**Bairro:** VILA OLIMPIA

**CEP:** 04.550-004

**UF:** SP

**Município:** SAO PAULO

**Telefone:** (11)4085-9070

**E-mail:** cepps@preventsenior.com.br

# PREVENT SENIOR

Continuação do Parecer: 3.912.441

## Comentários e Considerações sobre a Pesquisa:

O estudo apresenta relevância para a o desenvolvimento médico científico de modo geral uma vez que visa analisar a utilização de produtos e procedimentos menos invasivos em detrimento de procedimentos mais custosos e de elevada reabilitação do paciente. Assim, tal estudo pode ser referência clínica para futuras intervenções na área da ortopedia

## Considerações sobre os Termos de apresentação obrigatória:

Todos os termos foram alterados conforme solicitado em parecer anterior e estão de acordo com os requisitos e orientações do CEP.

## Recomendações:

Recomenda-se atenção no cumprimento das exigências da Res. 466/12 e complementares e Guia de Boas Práticas.

Atentar-se ao período e envio de relatórios parciais (semestralmente) e relatório final de estudo ao sistema CEP-CONEP, via plataforma Brasil, para acompanhamento do desenvolvimento do trabalho.

## Conclusões ou Pendências e Lista de Inadequações:

As pendências apontadas foram atendidas e/ou justificadas.

## Considerações Finais a critério do CEP:

### Este parecer foi elaborado baseado nos documentos abaixo relacionados:

| Tipo Documento                            | Arquivo                                       | Postagem               | Autor                   | Situação |
|-------------------------------------------|-----------------------------------------------|------------------------|-------------------------|----------|
| Informações Básicas do Projeto            | PB_INFORMAÇÕES_BÁSICAS_DO_PROJETO_1458201.pdf | 20/02/2020<br>15:01:35 |                         | Aceito   |
| Orçamento                                 | ORCAMENTO_SEGUNDA_REVISAO.pdf                 | 20/02/2020<br>15:01:22 | GABRIEL FERRAZ FERREIRA | Aceito   |
| Projeto Detalhado / Brochura Investigador | PROJETO_PESQUISA_QUINTA_REVISAO.pdf           | 20/02/2020<br>15:01:12 | GABRIEL FERRAZ FERREIRA | Aceito   |
| Outros                                    | CARTA_RESPOSTA_SEXTA_REVISAO.pdf              | 20/02/2020<br>15:00:52 | GABRIEL FERRAZ FERREIRA | Aceito   |
| Cronograma                                | CRONOGRAMA_PRIMEIRA_REVISAO.pdf               | 20/02/2020<br>15:00:11 | GABRIEL FERRAZ FERREIRA | Aceito   |
| Outros                                    | Termo_Confidencialidade.pdf                   | 20/02/2020<br>14:59:57 | GABRIEL FERRAZ FERREIRA | Aceito   |
| TCLE / Termos de                          | TCLE_QUINTA_REVISAO.pdf                       | 20/02/2020             | GABRIEL FERRAZ FERREIRA | Aceito   |

**Endereço:** Rua Lourenço Marques 158, 6º andar

**Bairro:** VILA OLIMPIA

**CEP:** 04.550-004

**UF:** SP

**Município:** SAO PAULO

**Telefone:** (11)4085-9070

**E-mail:** cepps@preventsenior.com.br

# PREVENT SENIOR

Continuação do Parecer: 3.912.441

|                                            |                               |                        |                                   |        |
|--------------------------------------------|-------------------------------|------------------------|-----------------------------------|--------|
| Assentimento / Justificativa de Ausência   | TCLE_QUINTA_REVISAO.pdf       | 14:59:08               | FERREIRA                          | Aceito |
| Outros                                     | Validacao_Gabriel07.pdf       | 31/01/2020<br>14:45:09 | DANIELA RIMOLDI<br>CUNHA          | Aceito |
| Outros                                     | Validacao_Gabriel06.pdf       | 24/01/2020<br>16:40:15 | DANIELA RIMOLDI<br>CUNHA          | Aceito |
| Outros                                     | Validacao_Gabriel_05.docx     | 13/01/2020<br>15:34:52 | DANIELA RIMOLDI<br>CUNHA          | Aceito |
| Outros                                     | CARTA_CEP_29_12_19.pdf        | 29/12/2019<br>21:40:11 | GABRIEL FERRAZ<br>FERREIRA        | Aceito |
| Outros                                     | Validacao_gabriel04.pdf       | 20/12/2019<br>11:09:04 | Henrique Guindalini<br>Deliberato | Aceito |
| Outros                                     | Parecer_IPS.pdf               | 18/12/2019<br>17:46:42 | GABRIEL FERRAZ<br>FERREIRA        | Aceito |
| Folha de Rosto                             | FOLHA_DE_ROSTO.pdf            | 18/12/2019<br>17:45:02 | GABRIEL FERRAZ<br>FERREIRA        | Aceito |
| Outros                                     | Validacao_Gabriel03.pdf       | 02/12/2019<br>15:04:56 | Henrique Guindalini<br>Deliberato | Aceito |
| Outros                                     | Validacao_Gabriel02.pdf       | 11/11/2019<br>13:58:23 | Henrique Guindalini<br>Deliberato | Aceito |
| Outros                                     | Validacao_Gabriel01.pdf       | 04/11/2019<br>16:21:02 | Henrique Guindalini<br>Deliberato | Aceito |
| Declaração de Instituição e Infraestrutura | infraestrutura.pdf            | 01/11/2019<br>11:54:02 | GABRIEL FERRAZ<br>FERREIRA        | Aceito |
| Outros                                     | APRESENTACAO.pdf              | 23/10/2019<br>11:32:00 | GABRIEL FERRAZ<br>FERREIRA        | Aceito |
| Declaração de Pesquisadores                | Declaracao_do_Pesquisador.pdf | 23/10/2019<br>11:31:31 | GABRIEL FERRAZ<br>FERREIRA        | Aceito |

## Situação do Parecer:

Aprovado

## Necessita Apreciação da CONEP:

Não

SAO PAULO, 12 de Março de 2020

Assinado por:  
**PATRICIA ESPINDOLA BRETAS BERBARE**  
(Coordenador(a))

**Endereço:** Rua Lourenço Marques 158, 6º andar

**Bairro:** VILA OLIMPIA

**CEP:** 04.550-004

**UF:** SP

**Município:** SAO PAULO

**Telefone:** (11)4085-9070

**E-mail:** cepps@preventsenior.com.br
